# Supplementary material for: The exon quantification pipeline (EQP): a comprehensive approach to the quantification of gene, exon and junction expression from RNA-seq data
Source: PubMed Central journal article supplement — Nucleic Acids Res. 2016 Jun 14;44(16):e132. doi: 10.1093/nar/gkw538 (PMC5027495; doi:10.1093/nar/gkw538), 2016-06-14
Supplement: supp_gkw538_nar-02728-met-n-2015-File015.pdf [file supp_gkw538_nar-02728-met-n-2015-File015.pdf]

# EQP Supplementary Information

---

## EQP fragment assignment criterion

The evidence-based assignment criterion of EQP requires that the alignment of a (paired-end) read is compatible with the considered feature. In the following we give a precise definition of this criterion for each feature type. Consider an alignment  $A$  of a (single) read against the genome and assume that  $A$  consists of the (maximal) intervals  $I_1, \dots, I_n$  ordered from left to right along the genomic axis.

- We say  $A$  is compatible with exon  $E$  if either  $n = 1$  and the genomic interval  $I_E$  of  $E$  contains  $I_1$  or  $n > 1$  and one of the three following conditions is met:
  1.  $I_E$  equals one of the intervals  $I_j$  for  $1 < j < n$ .
  2.  $I_E$  contains  $I_1$  and the right end point of  $I_E$  equals the right end point of  $I_1$ .
  3.  $I_E$  contains  $I_n$  and the left end point of  $I_E$  equals the left end point of  $I_n$ .
- We say  $A$  is compatible with gene  $G$  if  $G$  contains exons  $E_1, \dots, E_n$  which are compatible with  $A$  and whose union contains  $A$ .
- We say  $A$  is compatible with the exon-exon junction between exons  $E_1$  and  $E_2$  if  $A$  is compatible with  $E_1$  and  $E_2$  and the two intervals  $I_i$  and  $I_j$  of  $A$  that are contained in  $E_1$  and  $E_2$  are consecutive, that is,  $j = i + 1$  or vice versa.

Now assume that  $A$  consists of the alignments  $A_1$  and  $A_2$  of two reads which are aligned as a read pair.

- We say  $A$  is compatible with exon  $E$  if  $A_1$  or  $A_2$  are compatible with  $E$ .
- We say  $A$  is compatible with gene  $G$  if  $A_1$  and  $A_2$  are compatible with  $G$ .
- We say  $A$  is compatible with junction  $J$  if  $A_1$  or  $A_2$  are compatible with  $J$ .

## Example for BED intersection

We illustrate how EQP generates the BED file which is the intersection of the BED file derived from the combined SAM file and the BED file containing the exon coordinates. Assume that we have three reads R1, R2, and R3 which are aligned against the transcripts, junctions, and the genome resulting in the following BED entries:

|                                        |          |          |    |     |     |    |   |   |
|----------------------------------------|----------|----------|----|-----|-----|----|---|---|
| ENST00000289963                        | 1268     | 1368     | R1 | 1   | +   |    |   |   |
| ENSG00000132507-junction-09/2-10/3:01: |          |          |    | 39  | 139 | R2 | 0 | + |
| 11                                     | 64823465 | 64823565 | R3 | 255 | -   |    |   |   |

- For read R1 the best alignments are against the transcripts and one of them is against the interval [1269,1368] on the forward strand of transcript ENST00000289963.
- For read R2 the best alignments are against the junctions and one of them is against the interval [40,139] on the forward strand of the Fasta sequence of length 200bp with identifier "ENSG00000132507-junction-09/2-10/3:01:". The identifier ENSG00000132507-junction-09/2-10/3:01: denotes the junction between exons 09/2 and 10/3 of gene ENSG00000132507 (the

exon numbering is generated by EQP; consecutive sequences of overlapping exons are numbered with a “/”). Exon 09/2 is too short (shorter than 100bp) and padded downstream by exon 01; exon 10/3 is long enough (otherwise the numbers of padding exons would be listed after the second colon of the identifier).

- For read R3 the best alignments are against the genome and one of them is against the interval [64823466,64823565] on the reverse strand of chromosome 11.

The above BED entries are intersected with the entries of a BED file which contains corresponding entries for the exons, for instance,

|                                        |          |          |                        |   |   |
|----------------------------------------|----------|----------|------------------------|---|---|
| ENST00000289963                        | 1229     | 1355     | 8/22527392/22527517/+  | 0 | + |
| ENST00000289963                        | 1355     | 1427     | 8/22528506/22528577/+  | 0 | + |
| ENSG00000132507-junction-09/2-10/3:01: | 26       | 100      | 17/7311578/7311651/+0  |   | + |
| ENSG00000132507-junction-09/2-10/3:01: | 100      | 734      | 17/7311822/7312455/+0  |   | + |
| 11                                     | 64823386 | 64824529 | 11/64823387/64824529/- | 0 | - |

These have the same semantic as the BED entries for the reads except that we now consider exons. Exon identifiers are given by their genomic coordinates, for instance, 8/22527392/22527517/+. By intersecting the two BED files we obtain information about the overlap between the reads and the exons. Here are the intersection BED entries for the reads and the exons:

|                                        |          |          |                      |       |   |                  |          |          |
|----------------------------------------|----------|----------|----------------------|-------|---|------------------|----------|----------|
| ENST00000289963                        | 1268     | 1368     | R1                   | 1.0   | + | ENST00000289963  | 1229     | 1355     |
| 8/22527392/22527517/+                  | 0        |          | +                    | 87    |   |                  |          |          |
| ENST00000289963                        | 1268     | 1368     | R1                   | 1.0   | + | ENST00000289963  | 1355     | 1427     |
| 8/22528506/22528577/+                  | 0        |          | +                    | 13    |   |                  |          |          |
| ENSG00000132507-junction-09/2-10/3:01: | 39       | 139      | R2                   | 0.0   | + | ENSG00000132507- |          |          |
| junction-09/2-10/3:01:                 | 26       | 100      | 17/7311578/7311651/+ | 0     | + | 61               |          |          |
| ENSG00000132507-junction-09/2-10/3:01: | 39       | 139      | R2                   | 0.0   | + | ENSG00000132507- |          |          |
| junction-09/2-10/3:01:                 | 100      | 734      | 17/7311822/7312455/+ | 0     | + | 39               |          |          |
| 11                                     | 64823465 | 64823565 | R3                   | 255.0 | - | 11               | 64823386 | 64824529 |
| 11/64823387/64824529/-                 | 0        |          | -                    | 100   |   |                  |          |          |

So, for instance, the alignment of read R1 overlaps the location of exon 8/22527392/22527517/+ on transcript ENST00000289963 by 87bp and of exon 8/22528506/22528577/+ by 13bp. From this information the (spliced) genomic alignment of read R1 can be easily computed.

## Paired-end reads

Paired-end reads impact two steps of the quantification process. Firstly, the information about read pairs is used in the alignment of the reads against the reference sequences. Here, alignments of a read pair in the correct orientation and at a distance which is compatible with the mean insert size should be preferred over alignments with either the wrong orientation or a very large distance between the two reads. Of course, the distance criterion can only be applied to the mapping of the reads against the transcripts (as performed by EQP or Tophat2) but not to a splice-aware mapping against the genome (as

performed by STAR or SpliceMap) since the distance between two reads can also depend on the comparatively large intron sizes if they map to two different exons.

Secondly, the information about read pairs can be used in the quantification step by counting read pairs instead of reads; that is, if both reads of a pair are compatible with a feature, the read pair is counted only once (instead of twice). This is implemented in all considered tools except for QuasR.

## Aligner command-line calls

### Tophat2 call (version v2.0.8b)

```
tophat2 <options> <Bowtie2 genome index> <Fastq file 1> <Fastq file1>
```

Options:

```
-p 6 --max-multihits 100 --mate-inner-dist 0 -o <output dir> --b2-sensitive --microexon-search --transcriptome-index <Bowtie2 transcript index> --prefilter-multihits
```

The Bowtie2 transcript index is a prebuilt index created by running Tophat2 on the Ensembl v76 GTF file augmented with GTF entries for the custom junction entries created by EQP to provide the greatest amount of reference information for Tophat2.

### STAR call (version 2.3.0)

```
STAR --genomeDir <STAR genome index> --runThreadN 6 --readFilesIn <Fastq file 1> <Fastq file 2> --genomeLoad LoadAndRemove --outFilterMultimapNmax 100 --outFilterMismatchNmax 6 --outFilterMismatchNoverLmax 0.2
```

The STAR genome index was built using a GTF file:

```
STAR --runMode genomeGenerate --genomeDir <STAR genome index> --genomeFastaFiles <genome Fasta file> --sjdbGTFfile <Ensembl GTF file> --sjdbOverhang 99
```

We only used the Ensembl GTF file. If junction GTF entries which are created by EQP are added to the Ensembl GTF file, then the size of the STAR index increases to ~35GB. We tested the alignment with and without the junction GTF entries on one sample (SEQC-A-BC01-s\_1):

|                               | Aligned reads | Exonic reads | Num. introns | Soft masked bases |
|-------------------------------|---------------|--------------|--------------|-------------------|
| Ensembl GTF file              | 9902168       | 8600456      | 219140       | 24194087          |
| Ensembl and junction GTF file | 9883014       | 8588842      | 260612       | 24176005          |

It is surprising that the number of aligned reads as well as the number of reads that map to exons is reduced if the junction GTF entries are added, on the other hand, the sensitivity for spliced is clearly increased.

### SpliceMap call

We make use of the SpliceMap implementation available in QuasR and call SpliceMap directly from R:

```
qAlign(<Fastq annotation file>, genome=<genome Fasta file>,  
alignmentsDir=<output SAM dir>, cacheDir=<temp dir>,  
splicedAlignment=TRUE)
```

## Comparison of uniquely aligned reads

Since SpliceMap considers only uniquely aligned reads, we also present data on the percent of uniquely aligned and uniquely aligned exonic reads for the other aligners.

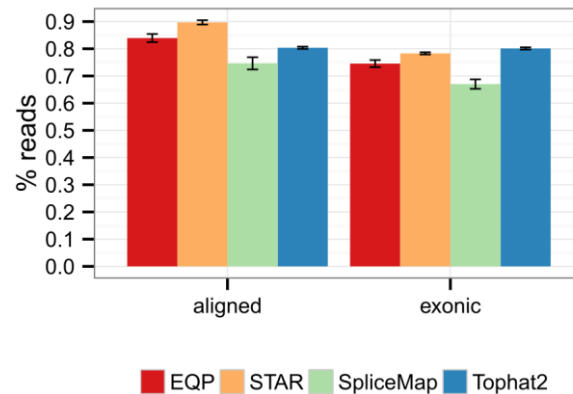

**Figure 1** The percent of uniquely aligned and uniquely aligned exonic reads for the aligners Bowtie2/EQP, STAR, SpliceMap, and Tophat2. The numbers for SpliceMap are the same as previously shown.

As can be seen the numbers are generally lower, yet SpliceMap still displays the least sensitivity as compared to the other aligners.

## Aligner execution times

The following figure shows the run times of the different alignment tools across the 64 Fastq files of the SEQC data set.

[illegible]

```

chrominfo=chrominfo,
dataSource="Ensembl",
species="Homo sapiens")
geneLevels <- qCount(proj, txdb, reportLevel="gene")

```

## Quantifier execution times

The following figure shows the run times of the different alignment tools across the 64 Fastq files of the SEQC data set.

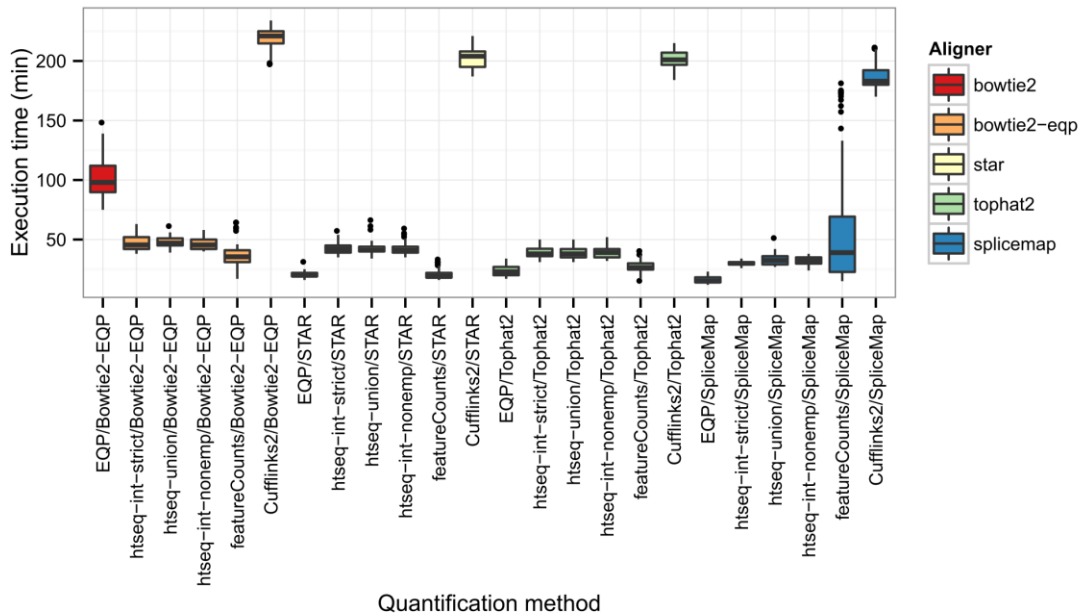

**Figure 3** Boxplots of the run times of the quantifiers in minutes grouped by aligners.

In Table 1 the median run times for each combination of quantifier and aligner is listed. On average EQP and htSeq need about 40 minutes, featureCounts about 25 minutes – if the run times for the SpliceMap alignments are considered as outliers – and Cufflinks2 about 3h 20 min. If the genome alignment file is provided, then EQP is very efficient and comparable to featureCounts with about 20 minutes on average. The high execution time of EQP on its own alignment module is due to the fact that EQP needs to process and combine three alignment files (the genome, transcript, and junction alignment file) before the actual quantification can be started.

|                         | Bowtie2-EQP | STAR  | Tophat2 | SpliceMap |
|-------------------------|-------------|-------|---------|-----------|
| <b>EQP</b>              | 100.55      | 20.48 | 23.78   | 16.30     |
| <b>htseq-int-strict</b> | 47.53       | 42.69 | 38.94   | 30.17     |
| <b>htseq-union</b>      | 47.53       | 42.27 | 39.14   | 33.00     |
| <b>htseq-int-nonemp</b> | 46.30       | 42.31 | 39.39   | 32.14     |

|                      |        |        |        |        |
|----------------------|--------|--------|--------|--------|
| <b>featureCounts</b> | 36.67  | 20.80  | 27.30  | 59.14  |
| <b>Cufflinks2</b>    | 218.75 | 202.59 | 200.69 | 187.77 |

**Table 1** The median run times for quantifier/aligner combinations.

## Computation of Taqman log fold change values

In order to be able to also assign a fold change value to sample pairs in which the count(s) in one (or both) sample(s) are zero we add a pseudo count of 0.1 to the RNA-seq derived gene counts (which corresponds to about one assigned fragment). In order to be able to use the same pseudo-count also for the FPKM values provided by Cufflinks, the Cufflinks gene abundance estimates are converted to CPMs by multiplying the values with the gene length in kilo bases for each gene.

Note that the value of 0.1 for the pseudo count is quite low and should not lead to artificially inflated correlation values as most variation in the data is maintained.

The 32 fold change values for the different RNA-seq quantification methods are chosen based on the lane pairs SEQC-A-BC<n>-s\_<m> and SEQC-B-BC<n+1>-s\_<m> where <n> is a barcode number (01, 02, 05, 06, etc.) and <m> is a lane number (1, 2, ..., 8), for instance, the first pair used for the calculation of a fold change is SEQC-A-BC01-s\_1/ SEQC-B-BC02-s\_1 and the last pair is SEQC-A-BC13-s\_8/ SEQC-B-BC14-s\_8.

## Comparison of Taqman log fold changes with the coefficient of determination

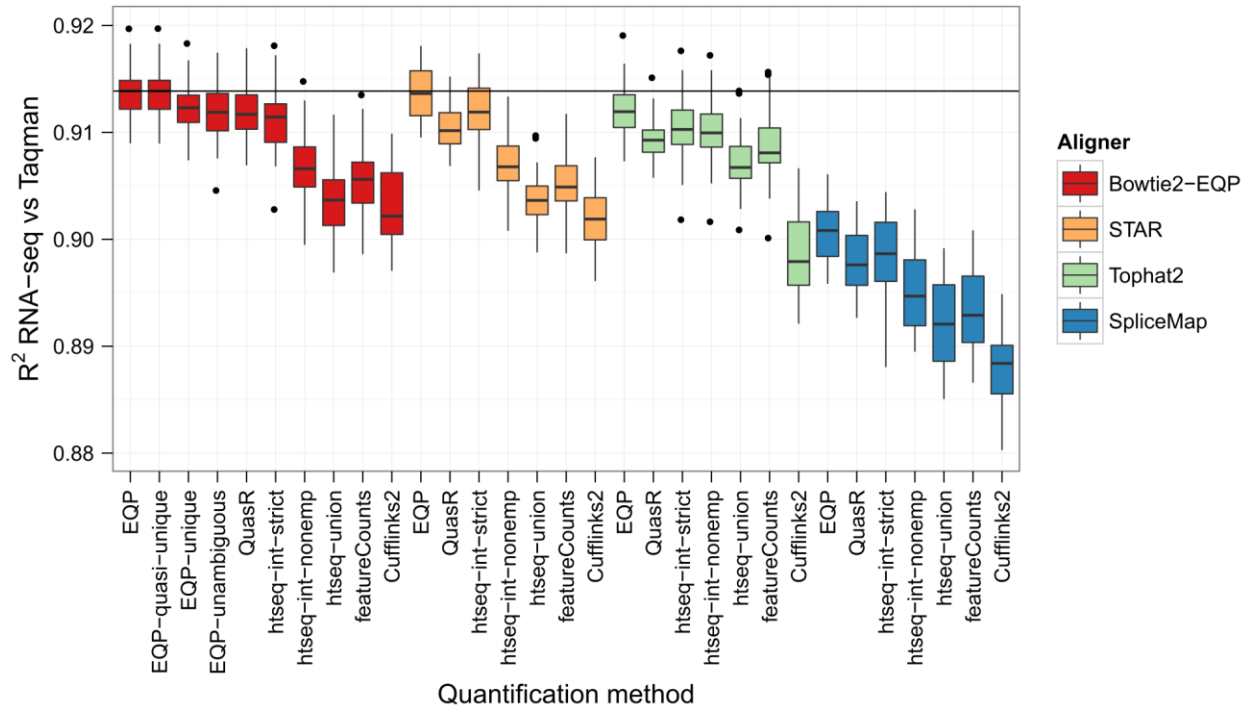

Figure D Comparison of log fold changes to Taqman log fold changes for different alignment and quantification methods using the coefficient of determination ( $R^2$ ).

The general ranking of aligners and quantification methods with respect to the coefficient of determination is very similar to the ranking given by RMSD with the exception of Cufflinks2 which now performs slightly. This is in agreement with the results shown in (1) where also transcript abundance estimation methods fared considerably better with RMSD than with the correlation coefficient compared to htseq-count.

Simulated RNA-seq data: Spearman correlation and log FC R<sup>2</sup> values

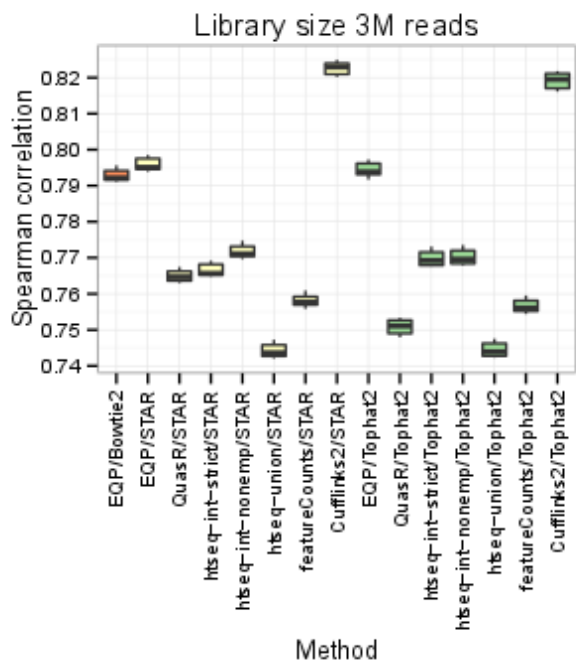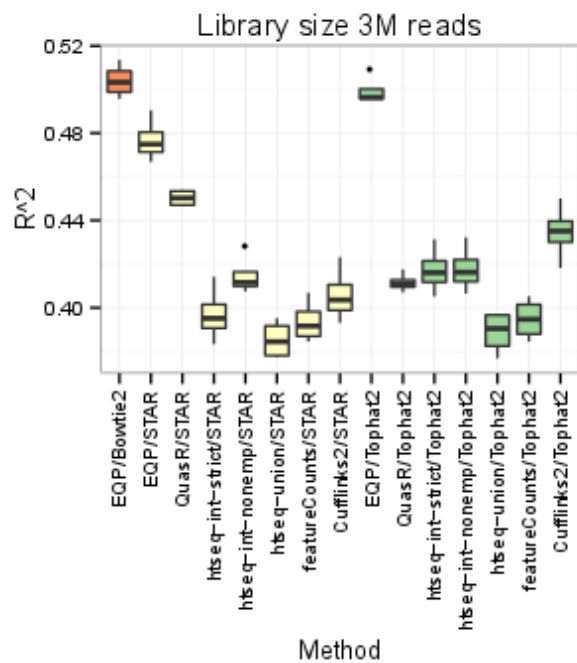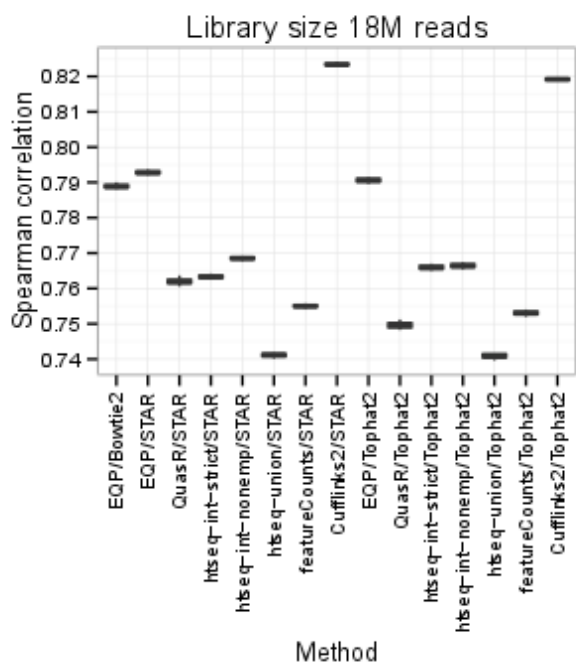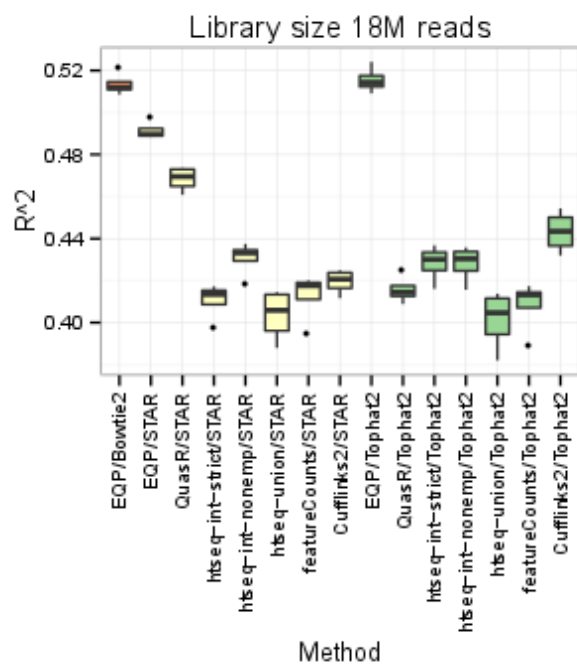

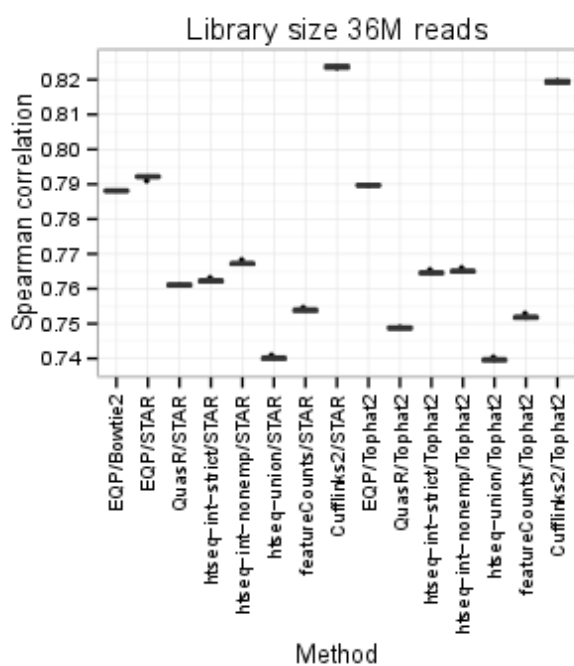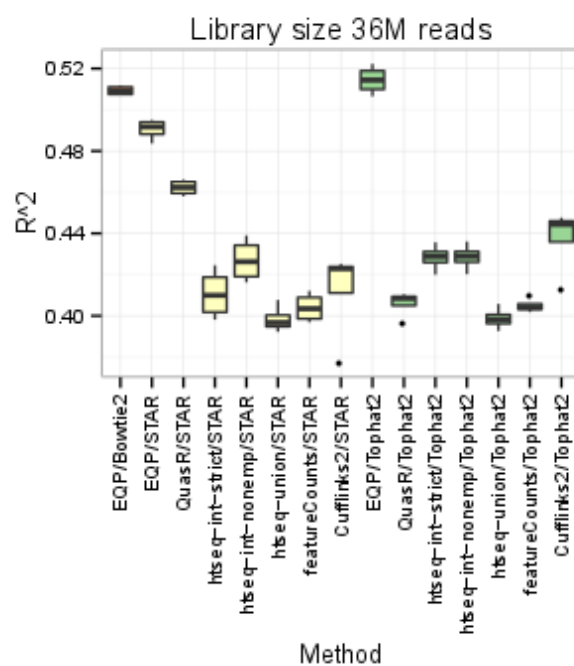

## An example of a non-overlapping exon with differing exon counts between EQP and dexseq-count

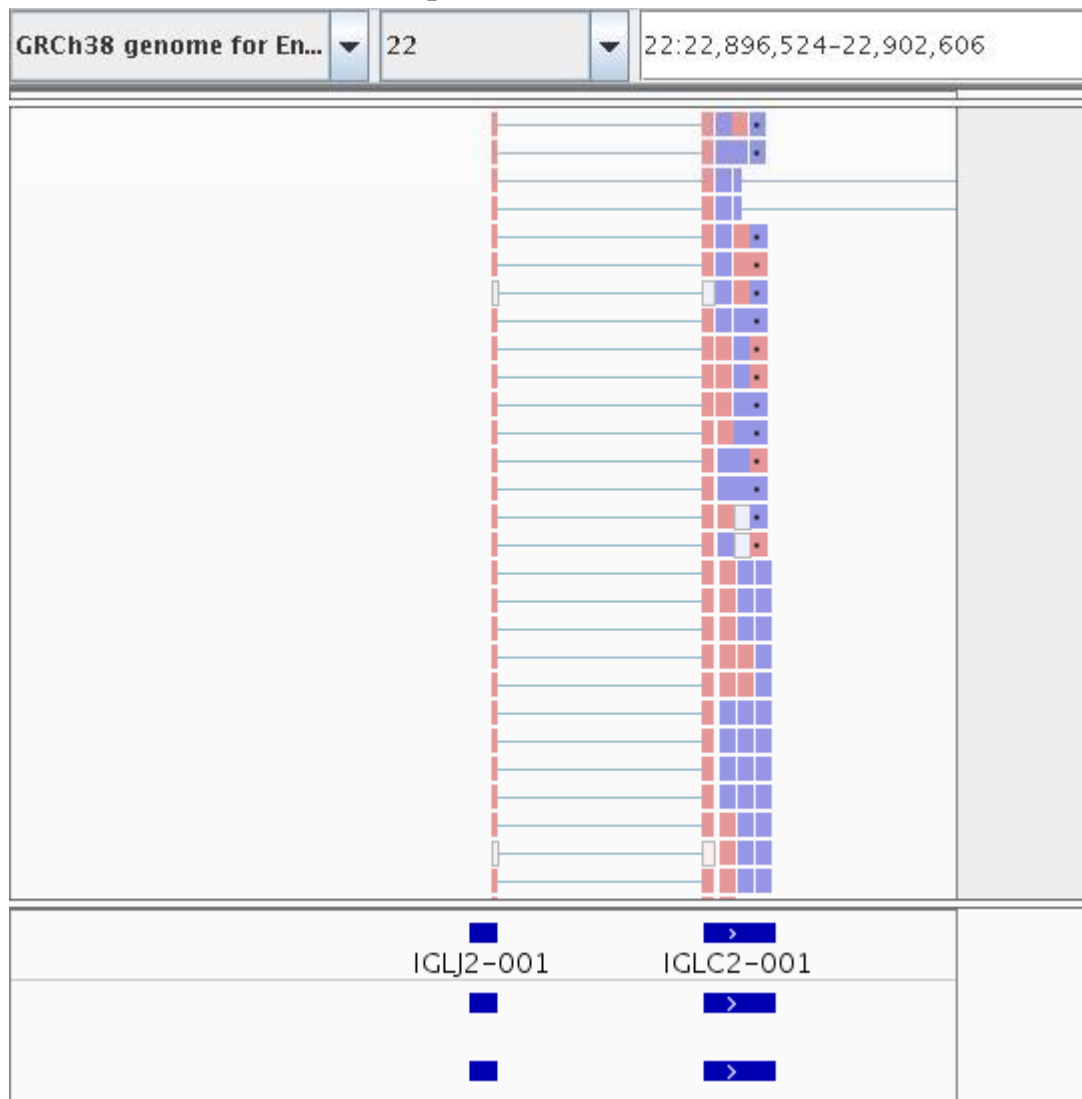

The two genes IGLJ2 and IGLC2-001 consist of single exons and are connected by a number of reads. However, since the reads align to two genes they are not counted by dexseq-count.

## Junction counts for the exons E<sub>1</sub> and E<sub>2</sub>

The Ensembl exon ids for the exons E<sub>1</sub> and E<sub>2</sub> of the main text are ENSE00002290307 and ENSE00003736927. We show here the non-zero counts of junctions for eight upstream exons for which the exons E<sub>1</sub> or E<sub>2</sub> being predicted to be the splice acceptor for the STAR alignments of sample SEQC-A-BC01 lane s\_1.

| Junction Id with E <sub>1</sub> (ENSE00002290307) as splice acceptor | Count |
|----------------------------------------------------------------------|-------|
| Ensembl junction ENSE00001816391 ENSE00002290307                     | 4     |
| Ensembl junction ENSE00001202935 ENSE00002290307                     | 4     |

|                                                  |   |
|--------------------------------------------------|---|
| Ensembl junction ENSE00002247518 ENSE00002290307 | 4 |
|--------------------------------------------------|---|

| Junction Id with E <sub>2</sub> (ENSE00003736927) as splice acceptor | Count |
|----------------------------------------------------------------------|-------|
| Ensembl junction ENSE00001202935 ENSE00003736927                     | 289   |
| Ensembl junction ENSE00001511597 ENSE00003736927                     | 217   |
| Ensembl junction ENSE00001675096 ENSE00003736927                     | 285   |
| Ensembl junction ENSE00001816391 ENSE00003736927                     | 289   |
| Ensembl junction ENSE00002203018 ENSE00003736927                     | 266   |
| Ensembl junction ENSE00002228967 ENSE00003736927                     | 286   |
| Ensembl junction ENSE00002237874 ENSE00003736927                     | 282   |
| Ensembl junction ENSE00002247518 ENSE00003736927                     | 289   |

It can be clearly seen that EQP predicts almost no junctions for E<sub>1</sub> and a high number of junctions for E<sub>2</sub>. Note that reads are counted for duplicate junctions if their splicing pattern is consistent with those multiple exons that share the same boundary.

In QuasR the junction upstream of E<sub>1</sub> and E<sub>2</sub> is represented by the intron 12:130872127-130872583 and the counts are reported separately for the plus and minus strand:

| Junction Id              | Count |
|--------------------------|-------|
| 12:130872127-130872583:+ | 315   |
| 12:130872127-130872583:- | 64    |

The difference in the reported counts (315 + 64 vs 289) is explained by the following observations:

1. QuasR reports read counts whereas EQP reports fragment counts, that is, if both the forward and reverse read cross the junction, EQP only reports one count whereas QuasR reports a count for the plus and a count for the minus strand.
2. In QuasR an overlap of one base is considered sufficient to report a spanning read whereas EQP requires an overlap of eight bases (or the length of the exon for exons shorter than eight nucleotides). There are 26 reads which overlap the upstream exon of the junction with less than eight nucleotides.

## GEO qRT-PCR Taqman samples

| GEO series | GEO sample | GEO sample name | Sample name | Sample |
|------------|------------|-----------------|-------------|--------|
| GSE5350    | GSM129638  | MAQC_TAQ_1_A1   | SEQC-A-BC01 | UHRR   |
| GSE5350    | GSM129639  | MAQC_TAQ_1_A2   | SEQC-A-BC05 | UHRR   |
| GSE5350    | GSM129640  | MAQC_TAQ_1_A3   | SEQC-A-BC09 | UHRR   |
| GSE5350    | GSM129641  | MAQC_TAQ_1_A4   | SEQC-A-BC13 | UHRR   |
| GSE5350    | GSM129642  | MAQC_TAQ_1_B1   | SEQC-B-BC02 | HBR    |
| GSE5350    | GSM129643  | MAQC_TAQ_1_B2   | SEQC-B-BC06 | HBR    |
| GSE5350    | GSM129644  | MAQC_TAQ_1_B3   | SEQC-B-BC10 | HBR    |
| GSE5350    | GSM129645  | MAQC_TAQ_1_B4   | SEQC-B-BC14 | HBR    |

## GEO RNA-seq samples

| GEO series | GEO sample | GEO sample name                        | Sample name     | Sample |
|------------|------------|----------------------------------------|-----------------|--------|
| GSE47774   | GSM1157925 | SEQC_ILM_NVS_A_1_L01_ATCACG_AD0902ACXX | SEQC-A-BC01-s_1 | UHRR   |
| GSE47774   | GSM1157927 | SEQC_ILM_NVS_A_1_L02_ATCACG_AD0902ACXX | SEQC-A-BC01-s_2 | UHRR   |
| GSE47774   | GSM1157929 | SEQC_ILM_NVS_A_1_L03_ATCACG_AD0902ACXX | SEQC-A-BC01-s_3 | UHRR   |
| GSE47774   | GSM1157931 | SEQC_ILM_NVS_A_1_L04_ATCACG_AD0902ACXX | SEQC-A-BC01-s_4 | UHRR   |
| GSE47774   | GSM1157933 | SEQC_ILM_NVS_A_1_L05_ATCACG_AD0902ACXX | SEQC-A-BC01-s_5 | UHRR   |
| GSE47774   | GSM1157935 | SEQC_ILM_NVS_A_1_L06_ATCACG_AD0902ACXX | SEQC-A-BC01-s_6 | UHRR   |
| GSE47774   | GSM1157937 | SEQC_ILM_NVS_A_1_L07_ATCACG_AD0902ACXX | SEQC-A-BC01-s_7 | UHRR   |
| GSE47774   | GSM1157939 | SEQC_ILM_NVS_A_1_L08_ATCACG_AD0902ACXX | SEQC-A-BC01-s_8 | UHRR   |
| GSE47774   | GSM1157941 | SEQC_ILM_NVS_A_2_L01_ACAGTG_AD0902ACXX | SEQC-A-BC05-s_1 | UHRR   |
| GSE47774   | GSM1157943 | SEQC_ILM_NVS_A_2_L02_ACAGTG_AD0902ACXX | SEQC-A-BC05-s_2 | UHRR   |
| GSE47774   | GSM1157945 | SEQC_ILM_NVS_A_2_L03_ACAGTG_AD0902ACXX | SEQC-A-BC05-s_3 | UHRR   |
| GSE47774   | GSM1157947 | SEQC_ILM_NVS_A_2_L04_ACAGTG_AD0902ACXX | SEQC-A-BC05-s_4 | UHRR   |
| GSE47774   | GSM1157949 | SEQC_ILM_NVS_A_2_L05_ACAGTG_AD0902ACXX | SEQC-A-BC05-s_5 | UHRR   |
| GSE47774   | GSM1157951 | SEQC_ILM_NVS_A_2_L06_ACAGTG_AD0902ACXX | SEQC-A-BC05-s_6 | UHRR   |
| GSE47774   | GSM1157953 | SEQC_ILM_NVS_A_2_L07_ACAGTG_AD0902ACXX | SEQC-A-BC05-s_7 | UHRR   |
| GSE47774   | GSM1157955 | SEQC_ILM_NVS_A_2_L08_ACAGTG_AD0902ACXX | SEQC-A-BC05-s_8 | UHRR   |
| GSE47774   | GSM1157957 | SEQC_ILM_NVS_A_3_L01_GATCAG_AD0902ACXX | SEQC-A-BC09-s_1 | UHRR   |
| GSE47774   | GSM1157959 | SEQC_ILM_NVS_A_3_L02_GATCAG_AD0902ACXX | SEQC-A-BC09-s_2 | UHRR   |
| GSE47774   | GSM1157961 | SEQC_ILM_NVS_A_3_L03_GATCAG_AD0902ACXX | SEQC-A-BC09-s_3 | UHRR   |
| GSE47774   | GSM1157963 | SEQC_ILM_NVS_A_3_L04_GATCAG_AD0902ACXX | SEQC-A-BC09-s_4 | UHRR   |
| GSE47774   | GSM1157965 | SEQC_ILM_NVS_A_3_L05_GATCAG_AD0902ACXX | SEQC-A-BC09-s_5 | UHRR   |
| GSE47774   | GSM1157967 | SEQC_ILM_NVS_A_3_L06_GATCAG_AD0902ACXX | SEQC-A-BC09-s_6 | UHRR   |
| GSE47774   | GSM1157969 | SEQC_ILM_NVS_A_3_L07_GATCAG_AD0902ACXX | SEQC-A-BC09-s_7 | UHRR   |
| GSE47774   | GSM1157971 | SEQC_ILM_NVS_A_3_L08_GATCAG_AD0902ACXX | SEQC-A-BC09-s_8 | UHRR   |
| GSE47774   | GSM1157973 | SEQC_ILM_NVS_A_4_L01_AGTCAA_AD0902ACXX | SEQC-A-BC13-s_1 | UHRR   |
| GSE47774   | GSM1157975 | SEQC_ILM_NVS_A_4_L02_AGTCAA_AD0902ACXX | SEQC-A-BC13-s_2 | UHRR   |
| GSE47774   | GSM1157977 | SEQC_ILM_NVS_A_4_L03_AGTCAA_AD0902ACXX | SEQC-A-BC13-s_3 | UHRR   |
| GSE47774   | GSM1157979 | SEQC_ILM_NVS_A_4_L04_AGTCAA_AD0902ACXX | SEQC-A-BC13-s_4 | UHRR   |
| GSE47774   | GSM1157981 | SEQC_ILM_NVS_A_4_L05_AGTCAA_AD0902ACXX | SEQC-A-BC13-s_5 | UHRR   |
| GSE47774   | GSM1157983 | SEQC_ILM_NVS_A_4_L06_AGTCAA_AD0902ACXX | SEQC-A-BC13-s_6 | UHRR   |
| GSE47774   | GSM1157985 | SEQC_ILM_NVS_A_4_L07_AGTCAA_AD0902ACXX | SEQC-A-BC13-s_7 | UHRR   |
| GSE47774   | GSM1157987 | SEQC_ILM_NVS_A_4_L08_AGTCAA_AD0902ACXX | SEQC-A-BC13-s_8 | UHRR   |
| GSE47774   | GSM1157989 | SEQC_ILM_NVS_B_1_L01_CGATGT_AD0902ACXX | SEQC-B-BC02-s_1 | HBR    |
| GSE47774   | GSM1157991 | SEQC_ILM_NVS_B_1_L02_CGATGT_AD0902ACXX | SEQC-B-BC02-s_2 | HBR    |
| GSE47774   | GSM1157993 | SEQC_ILM_NVS_B_1_L03_CGATGT_AD0902ACXX | SEQC-B-BC02-s_3 | HBR    |
| GSE47774   | GSM1157995 | SEQC_ILM_NVS_B_1_L04_CGATGT_AD0902ACXX | SEQC-B-BC02-s_4 | HBR    |
| GSE47774   | GSM1157997 | SEQC_ILM_NVS_B_1_L05_CGATGT_AD0902ACXX | SEQC-B-BC02-s_5 | HBR    |
| GSE47774   | GSM1157999 | SEQC_ILM_NVS_B_1_L06_CGATGT_AD0902ACXX | SEQC-B-BC02-s_6 | HBR    |
| GSE47774   | GSM1158001 | SEQC_ILM_NVS_B_1_L07_CGATGT_AD0902ACXX | SEQC-B-BC02-s_7 | HBR    |
| GSE47774   | GSM1158003 | SEQC_ILM_NVS_B_1_L08_CGATGT_AD0902ACXX | SEQC-B-BC02-s_8 | HBR    |

|          |            |                                        |                 |     |
|----------|------------|----------------------------------------|-----------------|-----|
| GSE47774 | GSM1158005 | SEQC_ILM_NVS_B_2_L01_GCCAAT_AD0902ACXX | SEQC-B-BC06-s_1 | HBR |
| GSE47774 | GSM1158007 | SEQC_ILM_NVS_B_2_L02_GCCAAT_AD0902ACXX | SEQC-B-BC06-s_2 | HBR |
| GSE47774 | GSM1158009 | SEQC_ILM_NVS_B_2_L03_GCCAAT_AD0902ACXX | SEQC-B-BC06-s_3 | HBR |
| GSE47774 | GSM1158011 | SEQC_ILM_NVS_B_2_L04_GCCAAT_AD0902ACXX | SEQC-B-BC06-s_4 | HBR |
| GSE47774 | GSM1158013 | SEQC_ILM_NVS_B_2_L05_GCCAAT_AD0902ACXX | SEQC-B-BC06-s_5 | HBR |
| GSE47774 | GSM1158015 | SEQC_ILM_NVS_B_2_L06_GCCAAT_AD0902ACXX | SEQC-B-BC06-s_6 | HBR |
| GSE47774 | GSM1158017 | SEQC_ILM_NVS_B_2_L07_GCCAAT_AD0902ACXX | SEQC-B-BC06-s_7 | HBR |
| GSE47774 | GSM1158019 | SEQC_ILM_NVS_B_2_L08_GCCAAT_AD0902ACXX | SEQC-B-BC06-s_8 | HBR |
| GSE47774 | GSM1158021 | SEQC_ILM_NVS_B_3_L01_TAGCTT_AD0902ACXX | SEQC-B-BC10-s_1 | HBR |
| GSE47774 | GSM1158023 | SEQC_ILM_NVS_B_3_L02_TAGCTT_AD0902ACXX | SEQC-B-BC10-s_2 | HBR |
| GSE47774 | GSM1158025 | SEQC_ILM_NVS_B_3_L03_TAGCTT_AD0902ACXX | SEQC-B-BC10-s_3 | HBR |
| GSE47774 | GSM1158027 | SEQC_ILM_NVS_B_3_L04_TAGCTT_AD0902ACXX | SEQC-B-BC10-s_4 | HBR |
| GSE47774 | GSM1158029 | SEQC_ILM_NVS_B_3_L05_TAGCTT_AD0902ACXX | SEQC-B-BC10-s_5 | HBR |
| GSE47774 | GSM1158031 | SEQC_ILM_NVS_B_3_L06_TAGCTT_AD0902ACXX | SEQC-B-BC10-s_6 | HBR |
| GSE47774 | GSM1158033 | SEQC_ILM_NVS_B_3_L07_TAGCTT_AD0902ACXX | SEQC-B-BC10-s_7 | HBR |
| GSE47774 | GSM1158035 | SEQC_ILM_NVS_B_3_L08_TAGCTT_AD0902ACXX | SEQC-B-BC10-s_8 | HBR |
| GSE47774 | GSM1158037 | SEQC_ILM_NVS_B_4_L01_AGTTC AD0902ACXX  | SEQC-B-BC14-s_1 | HBR |
| GSE47774 | GSM1158039 | SEQC_ILM_NVS_B_4_L02_AGTTC AD0902ACXX  | SEQC-B-BC14-s_2 | HBR |
| GSE47774 | GSM1158041 | SEQC_ILM_NVS_B_4_L03_AGTTC AD0902ACXX  | SEQC-B-BC14-s_3 | HBR |
| GSE47774 | GSM1158043 | SEQC_ILM_NVS_B_4_L04_AGTTC AD0902ACXX  | SEQC-B-BC14-s_4 | HBR |
| GSE47774 | GSM1158045 | SEQC_ILM_NVS_B_4_L05_AGTTC AD0902ACXX  | SEQC-B-BC14-s_5 | HBR |
| GSE47774 | GSM1158047 | SEQC_ILM_NVS_B_4_L06_AGTTC AD0902ACXX  | SEQC-B-BC14-s_6 | HBR |
| GSE47774 | GSM1158049 | SEQC_ILM_NVS_B_4_L07_AGTTC AD0902ACXX  | SEQC-B-BC14-s_7 | HBR |
| GSE47774 | GSM1158051 | SEQC_ILM_NVS_B_4_L08_AGTTC AD0902ACXX  | SEQC-B-BC14-s_8 | HBR |

1. Chandramohan, R., Po-Yen, W., Phan, J.H. and Wang, M.D. (2013), *Engineering in Medicine and Biology Society (EMBC), 2013 35th Annual International Conference of the IEEE*, pp. 647-650.
